# Supplementary material
Source: PubMed Central journal article supplement (PMC3746251)

## Supplementary Figure 2

### Co-transfection of GFP-wt KHDC3L and FLAG-wtNLRP7

Anti NLRP7 (Imgenex) and GFP- KHDC3L

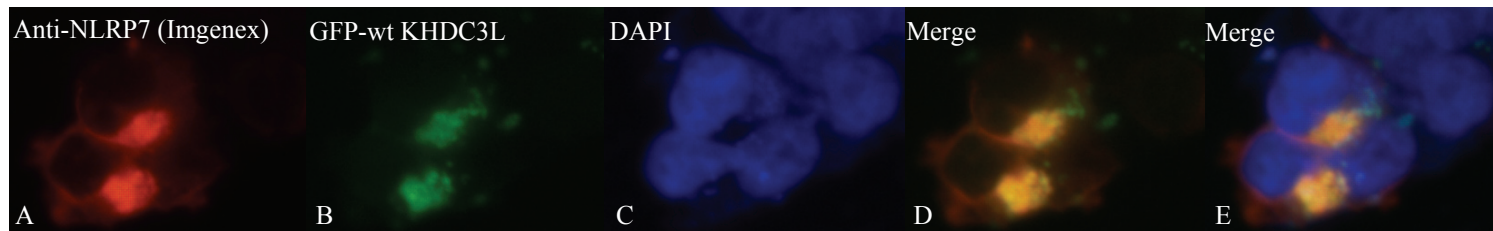

Anti-NLRP7 (Santa Cruz) and GFP- KHDC3L

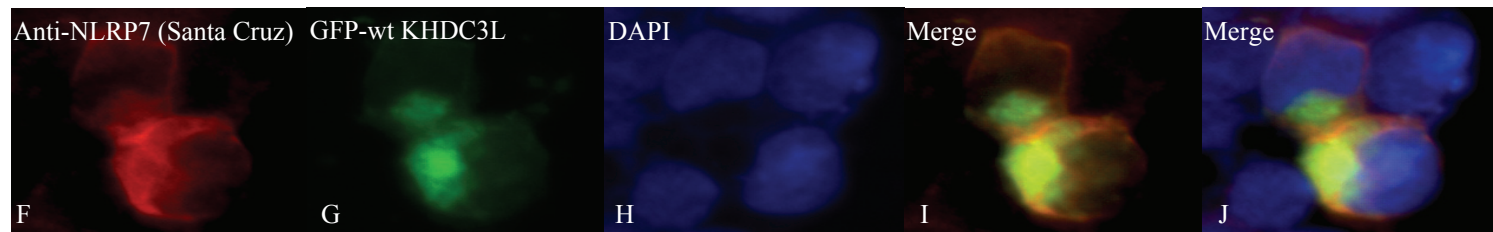

Supplement: ejhg2012274x2.pdf [file ejhg2012274x2.pdf]
